# Supplementary material
Source: PubMed Central journal article supplement (PMC4643633)

## Supplementary Materials

### Supplementary Table 1

We conducted a sensitivity analysis including only the subset of studies with a high degree of compliance. To determine compliance, for each trial, we first calculated the percentage of its sample size included in our original analysis (see the CONSORT Diagram in Figure 1 of our manuscript). The average percentage across all studies was 23%. We then defined a trial as “compliant” if its percentage was at least 30%. Six trials were identified as compliant based on this threshold. The predictive ability measures – specifically the c-indices and H-L statistics – are similar to those we obtained in the original analysis using all 13 trials, summarized in the tables below.

| All Trials           |                     |                     |                     |                     |                     |                     |
|----------------------|---------------------|---------------------|---------------------|---------------------|---------------------|---------------------|
|                      | Breast              |                     | NSCLC               |                     | Colon               |                     |
|                      | Slope<br>(N=189)    | % Change<br>(N=182) | Slope<br>(N=746)    | % Change<br>(N=734) | Slope<br>(N=322)    | % Change<br>(N=320) |
| c-index<br>(95% CI)* | 0.58<br>(0.53-0.65) | 0.55<br>(0.52-0.63) | 0.58<br>(0.55-0.61) | 0.57<br>(0.55-0.61) | 0.62<br>(0.58-0.68) | 0.64<br>(0.59-0.69) |
| RECIST               | 0.52                |                     | 0.57                |                     | 0.60                |                     |
| H-L                  | 0.05                | 0.04                | 0.03                | 0.01                | 0.12                | 0.05                |
| RECIST               | 0.05                |                     | 0.01                |                     | 0.04                |                     |

| Compliant Trials     |                     |                     |                     |                     |                     |                     |
|----------------------|---------------------|---------------------|---------------------|---------------------|---------------------|---------------------|
|                      | Breast              |                     | NSCLC               |                     | Colon               |                     |
|                      | Slope<br>(N=107)    | % Change<br>(N=101) | Slope<br>(N=715)    | % Change<br>(N=703) | Slope<br>(N=296)    | % Change<br>(N=294) |
| c-index<br>(95% CI)* | 0.61<br>(0.53-0.69) | 0.57<br>(0.49-0.65) | 0.57<br>(0.54-0.60) | 0.57<br>(0.54-0.60) | 0.63<br>(0.57-0.69) | 0.64<br>(0.58-0.70) |
| RECIST               | 0.54                |                     | 0.59                |                     | 0.60                |                     |
| H-L                  | 0.04                | 0.03                | 0.03                | 0.02                | 0.13                | 0.04                |
| RECIST               | 0.12                |                     | 0.01                |                     | 0.06                |                     |

\* 95% CI for c-indices are bootstrap confidence intervals.

**Supplementary Figure 1.** Scatterplots of 6-12 week vs. 0-6 week slope and % changes. Size of plotting symbol proportional to the average baseline sum.

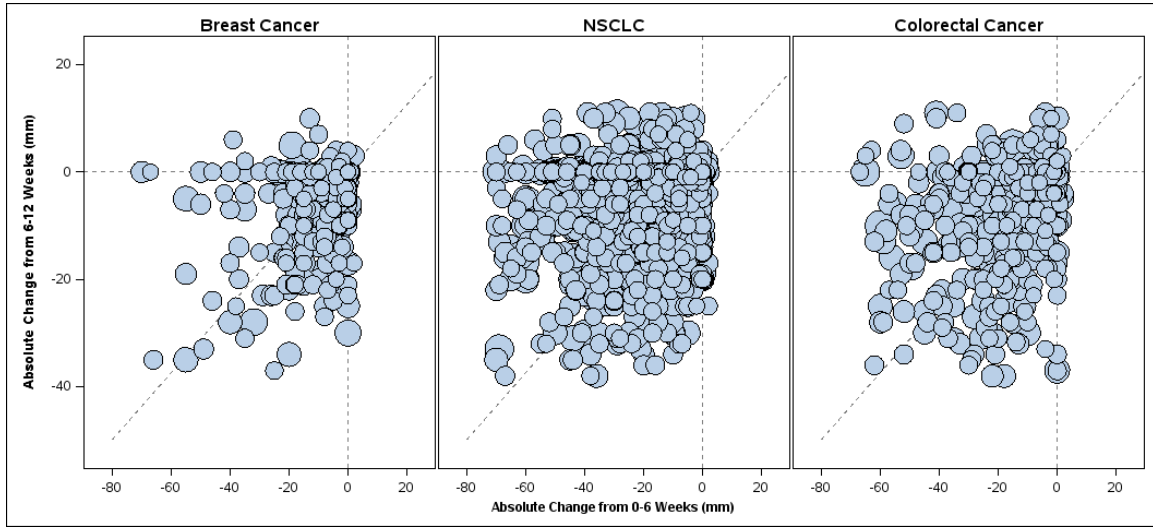

Supplement: supp_djv239_Supplementary_Materials.pdf [file supp_djv239_Supplementary_Materials.pdf]
